# Supplementary material for: Effect of Different Concentrations of NiMnGa Micro/Nanoparticles on the Kinetics of Natural Gas Hydration
Source: MDPI journal article supplement (doi:10.3390/pr11113149), 2023-11-04
Supplement: s1 [file s1]

## Supplementary Material

**Table S1.** Experimental conditions and results for gas hydrate in different concentrations

| Particle Conc. (wt%) | Exp.no | Induction time (min) | Average induction time (min) | Gas Consumption (mmol/mol) | Average gas Consumption (mmol/mol) | Hydration reaction time(min) | Average hydration reaction time(min) | Gas Consumption rate (mmol/mol/min) | Average gas Consumption rate (mmol/mol/min) |
|----------------------|--------|----------------------|------------------------------|----------------------------|------------------------------------|------------------------------|--------------------------------------|-------------------------------------|---------------------------------------------|
| 0                    | G1-1   | 144.5                | 113.900                      | 9.450                      | 9.700                              | 230.488                      | 185.578                              | 0.041                               | 0.054                                       |
|                      |        | 78                   |                              | 9.480                      |                                    | 178.868                      |                                      | 0.053                               |                                             |
|                      |        | 119.2                |                              | 10.169                     |                                    | 147.377                      |                                      | 0.069                               |                                             |
|                      | G2-1   | 56.2                 | 48.300                       | 16.328                     | 16.494                             | 120.948                      | 155.941                              | 0.135                               | 0.113                                       |
|                      |        | 49.5                 |                              | 15.461                     |                                    | 125.699                      |                                      | 0.123                               |                                             |
|                      |        | 39.2                 |                              | 17.694                     |                                    | 221.175                      |                                      | 0.080                               |                                             |
|                      | G3-1   | 14.67                | 42.880                       | 23.392                     | 23.709                             | 117.548                      | 107.134                              | 0.199                               | 0.222                                       |
|                      |        | 39.8                 |                              | 25.654                     |                                    | 103.028                      |                                      | 0.249                               |                                             |
|                      |        | 74.17                |                              | 22.081                     |                                    | 100.826                      |                                      | 0.219                               |                                             |
| 0.1                  | G1-2   | 4.3                  | 3.433                        | 8.983                      | 11.873                             | 62.382                       | 92.229                               | 0.144                               | 0.135                                       |
|                      |        | 2.8                  |                              | 12.138                     |                                    | 126.438                      |                                      | 0.096                               |                                             |
|                      |        | 3.2                  |                              | 14.498                     |                                    | 87.867                       |                                      | 0.165                               |                                             |
|                      | G2-2   | 7                    | 8.867                        | 20.199                     | 16.575                             | 69.412                       | 76.395                               | 0.291                               | 0.221                                       |
|                      |        | 12.8                 |                              | 14.319                     |                                    | 83.737                       |                                      | 0.171                               |                                             |
|                      |        | 6.8                  |                              | 15.207                     |                                    | 76.035                       |                                      | 0.200                               |                                             |
|                      | G3-2   | 12.5                 | 5.833                        | 26.310                     | 26.223                             | 82.219                       | 73.995                               | 0.320                               | 0.360                                       |
|                      |        | 1.5                  |                              | 24.660                     |                                    | 59.709                       |                                      | 0.413                               |                                             |
|                      |        | 3.5                  |                              | 27.700                     |                                    | 80.058                       |                                      | 0.346                               |                                             |

|   |      |      |       |        |        |        |        |       |       |
|---|------|------|-------|--------|--------|--------|--------|-------|-------|
| 1 | G1-3 | 4.8  | 4.000 | 10.624 | 13.336 | 83.654 | 70.872 | 0.127 | 0.196 |
|   |      | 3.7  |       | 14.238 |        | 70.485 |        | 0.202 |       |
|   |      | 3.5  |       | 15.146 |        | 58.479 |        | 0.259 |       |
|   | G2-3 | 2.5  | 2.433 | 20.192 | 21.564 | 70.355 | 82.139 | 0.287 | 0.264 |
|   |      | 2.3  |       | 22.255 |        | 90.837 |        | 0.245 |       |
|   |      | 2.5  |       | 22.244 |        | 85.226 |        | 0.261 |       |
|   | G3-3 | 1.5  | 1.433 | 26.865 | 24.968 | 81.905 | 79.647 | 0.328 | 0.312 |
|   |      | 1.5  |       | 28.367 |        | 84.175 |        | 0.337 |       |
|   |      | 1.3  |       | 19.672 |        | 72.859 |        | 0.270 |       |
| 2 | G1-4 | 1.8  | 5.267 | 8.107  | 10.803 | 33.500 | 47.950 | 0.242 | 0.229 |
|   |      | 10.5 |       | 10.838 |        | 57.957 |        | 0.187 |       |
|   |      | 3.5  |       | 13.465 |        | 52.393 |        | 0.257 |       |
|   | G2-4 | 3    | 2.600 | 21.960 | 21.416 | 63.103 | 59.033 | 0.348 | 0.363 |
|   |      | 2.3  |       | 20.751 |        | 57.323 |        | 0.362 |       |
|   |      | 2.5  |       | 21.536 |        | 56.674 |        | 0.380 |       |
|   | G3-4 | 2.8  | 2.967 | 27.934 | 27.141 | 71.260 | 67.032 | 0.392 | 0.410 |
|   |      | 3.3  |       | 27.391 |        | 57.544 |        | 0.476 |       |
|   |      | 2.8  |       | 26.097 |        | 72.291 |        | 0.361 |       |
| 3 | G1-5 | 1.5  | 1.867 | 14.632 | 14.617 | 59.239 | 59.853 | 0.247 | 0.244 |
|   |      | 2.8  |       | 14.433 |        | 61.417 |        | 0.235 |       |
|   |      | 1.3  |       | 14.785 |        | 58.904 |        | 0.251 |       |
|   | G2-5 | 1.8  | 1.333 | 16.912 | 18.961 | 58.317 | 57.179 | 0.290 | 0.335 |
|   |      | 1.2  |       | 19.460 |        | 49.517 |        | 0.393 |       |

|  |      |     |       |        |        |        |        |       |       |
|--|------|-----|-------|--------|--------|--------|--------|-------|-------|
|  |      | 1   |       | 20.512 |        | 63.702 |        | 0.322 |       |
|  | G3-5 | 0.7 | 0.867 | 29.040 | 27.022 | 63.965 | 61.060 | 0.454 | 0.444 |
|  |      | 0.7 |       | 26.624 |        | 64.937 |        | 0.410 |       |
|  |      | 1.2 |       | 25.402 |        | 54.278 |        | 0.468 |       |
